# Supplementary material for: Structural characterization of framework–gas interactions in the metal–organic framework Co2(dobdc) by in situ single-crystal X-ray diffraction
Source: PubMed Central journal article supplement — Chem Sci. 2017 Apr 19;8(6):4387–98. doi: 10.1039/c7sc00449d (PMC5580307; doi:10.1039/c7sc00449d), 2017-04-19
Supplement: SC-008-C7SC00449D-s001.pdf [file SC-008-C7SC00449D-s001.pdf]

**Electronic Supplementary Information for:**  
**Structural characterization of framework–gas interactions  
in the metal–organic framework Co<sub>2</sub>(dobdc) by *in situ*  
single-crystal X-ray diffraction**

Miguel I. Gonzalez,<sup>a</sup> Jarad A. Mason,<sup>a</sup> Eric D. Bloch,<sup>a</sup> Simon J. Teat,<sup>b</sup> Kevin J. Gagnon,<sup>b</sup>  
Gregory Y. Morrison,<sup>b</sup> Wendy L. Queen,<sup>cd</sup> and Jeffrey R. Long<sup>\*aef</sup>

<sup>a</sup>Department of Chemistry, University of California, Berkeley, California, 94720-1462, USA.

<sup>b</sup>Advanced Light Source, Lawrence Berkeley National Laboratory, Berkeley, California, 94720, USA.

<sup>c</sup>The Molecular Foundry, Lawrence Berkeley National Laboratory, Berkeley, California, 94720, USA.

<sup>d</sup>École Polytechnique Fédérale de Lausanne (EPFL), Institut des Sciences et Ingénierie Chimiques, CH 1051 Sion, Switzerland

<sup>e</sup>Department of Chemical and Biomolecular Engineering, University of California, Berkeley, California, 94720-1462, USA.

<sup>f</sup>Materials Sciences Division, Lawrence Berkeley National Laboratory, Berkeley, California 94720, United States, 94720, USA.

## Table of Contents

|                                                                                              |    |
|----------------------------------------------------------------------------------------------|----|
| Supplementary Figures .....                                                                  | 3  |
| Thermal ellipsoid plots and crystallographic tables .....                                    | 5  |
| Langmuir fits for low-pressure gas adsorption isotherms of $\text{Co}_2(\text{dobdc})$ ..... | 14 |
| Low-coverage differential enthalpy of adsorption plots for $\text{Co}_2(\text{dobdc})$ ..... | 22 |
| References .....                                                                             | 22 |

## Supplementary Figures

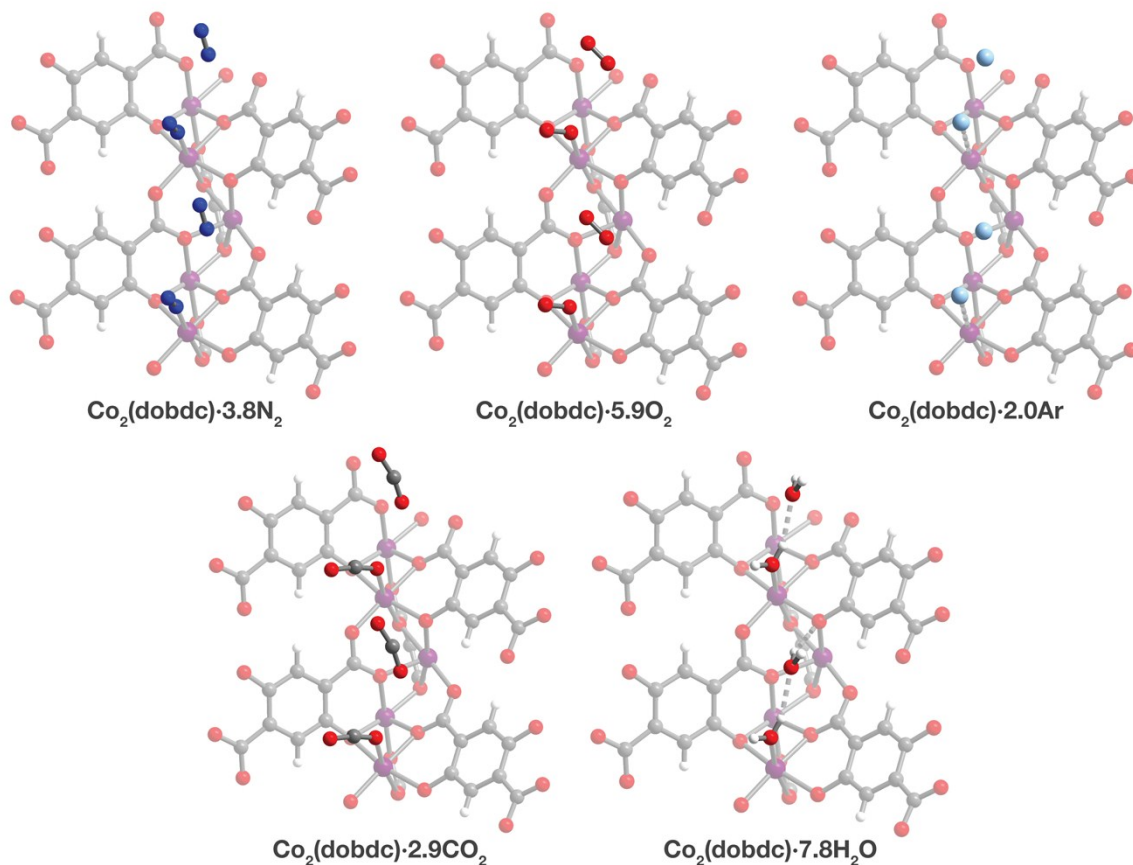

**Figure S1.** Comparison of the secondary binding sites in the structures of Co<sub>2</sub>(dobdc)·3.8N<sub>2</sub> at 100 K, Co<sub>2</sub>(dobdc)·5.9O<sub>2</sub> at 100 K, Co<sub>2</sub>(dobdc)·2.0Ar at 90 K, Co<sub>2</sub>(dobdc)·2.9CO<sub>2</sub><sup>1</sup> at 150 K, and Co<sub>2</sub>(dobdc)·7.8H<sub>2</sub>O<sup>2</sup> at 100 K as determined by single-crystal X-ray diffraction. Purple, red, gray, blue, light blue, and white spheres represent Co, O, C, N, Ar, and H atoms, respectively. The structures of Co<sub>2</sub>(dobdc)·2.9CO<sub>2</sub> and Co<sub>2</sub>(dobdc)·7.8H<sub>2</sub>O have been reported previously and are shown here to facilitate comparisons.

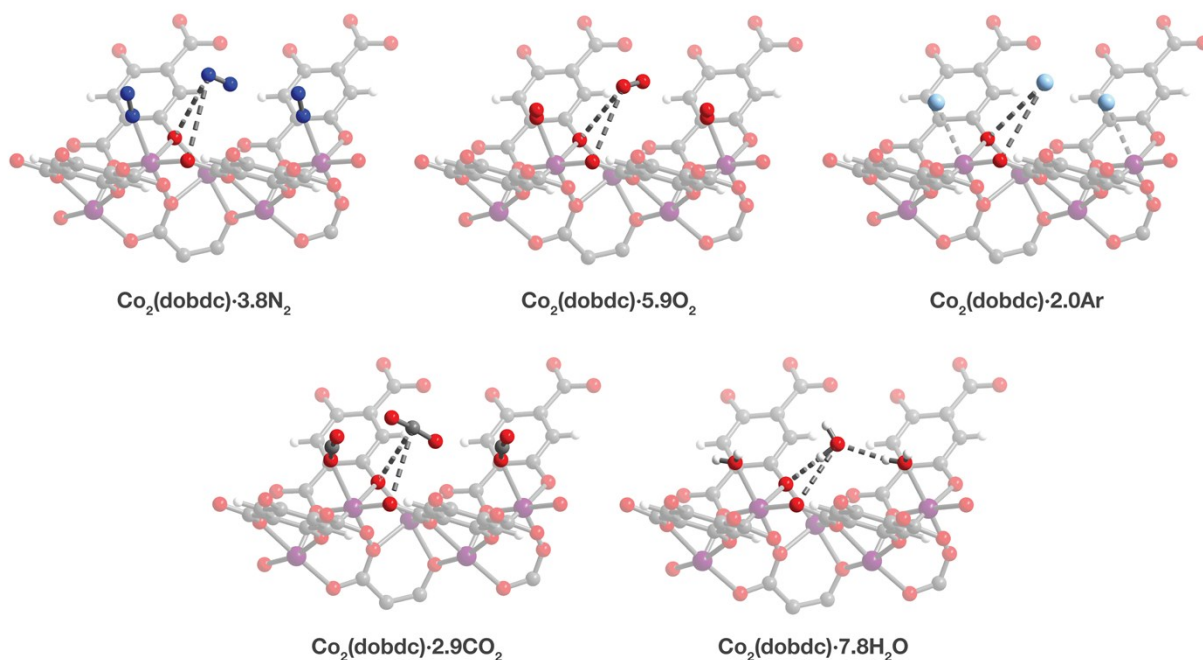

| Co <sub>2</sub> (dobdc)·3.8N <sub>2</sub> |           | Co <sub>2</sub> (dobdc)·5.9O <sub>2</sub> |             | Co <sub>2</sub> (dobdc)·2.0Ar |             | Co <sub>2</sub> (dobdc)·2.9CO <sub>2</sub> <sup>1</sup> |           | Co <sub>2</sub> (dobdc)·7.8H <sub>2</sub> O <sup>2</sup> |            |
|-------------------------------------------|-----------|-------------------------------------------|-------------|-------------------------------|-------------|---------------------------------------------------------|-----------|----------------------------------------------------------|------------|
| O1···N4                                   | 3.44(2) Å | O1···O7                                   | 3.391(17) Å | O1···Ar2                      | 3.683(16) Å | O1···C6                                                 | 3.21(5) Å | O1···H5a                                                 | 2.15(3) Å  |
| O3···N4                                   | 3.66(3) Å | O3···O7                                   | 3.376(18) Å | O3···Ar2                      | 3.767(18) Å | O3···C6                                                 | 3.29(8) Å | O3···O5                                                  | 3.172(4) Å |

**Figure S2.** Selected intermolecular contacts between the phenoxide oxygen (O1) and non-bridging carboxylate oxygen (O3) of the dobdc<sup>4-</sup> linkers and gases bound at secondary binding sites in the structures of Co<sub>2</sub>(dobdc)·3.8N<sub>2</sub> at 100 K, Co<sub>2</sub>(dobdc)·5.9O<sub>2</sub> at 100 K, Co<sub>2</sub>(dobdc)·2.0Ar at 90 K, Co<sub>2</sub>(dobdc)·2.9CO<sub>2</sub><sup>1</sup> at 150 K, and Co<sub>2</sub>(dobdc)·7.8H<sub>2</sub>O<sup>2</sup> at 100 K as determined by single-crystal X-ray diffraction. Purple, red, gray, blue, light blue, and white spheres represent Co, O, C, N, Ar, and H atoms, respectively. The structures of Co<sub>2</sub>(dobdc)·2.9CO<sub>2</sub> and Co<sub>2</sub>(dobdc)·7.8H<sub>2</sub>O have been reported previously and are shown here to facilitate comparisons.

## Thermal ellipsoid plots and crystallographic tables

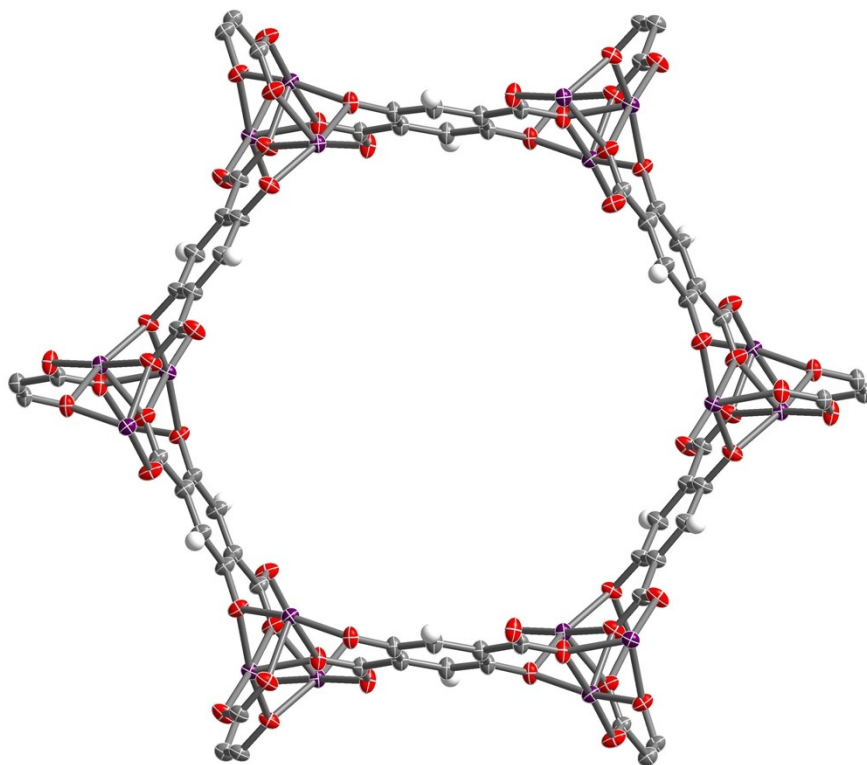

**Figure S3.** Thermal ellipsoid plot of Co<sub>2</sub>(dobdc) at 298 K drawn at 50% probability level as determined by single-crystal X-ray diffraction; purple, red, gray and white ellipsoids represent Co, O, C, and H atoms, respectively.

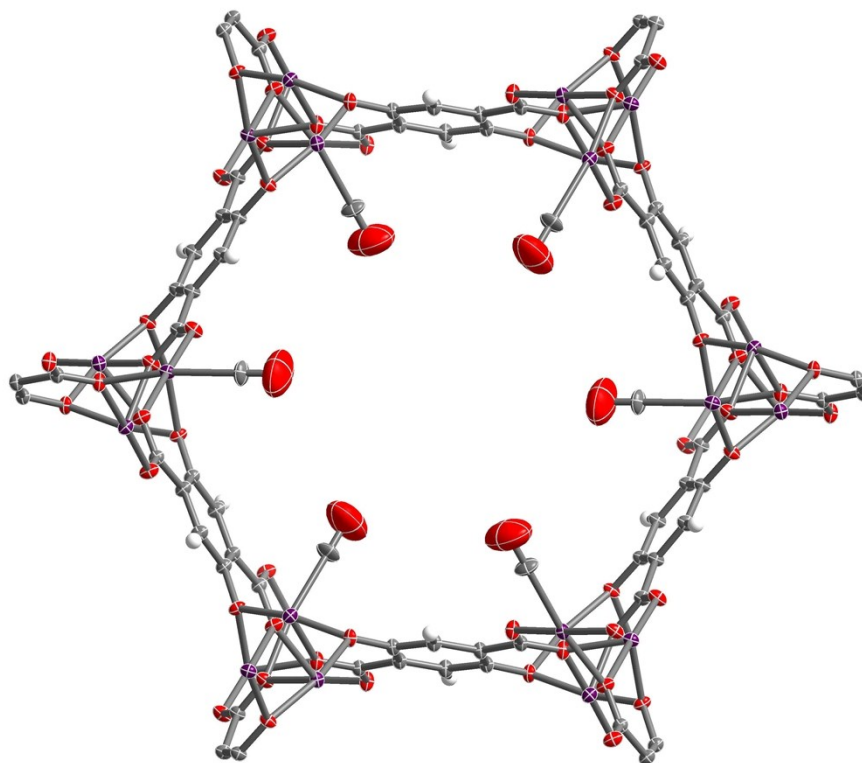

**Figure S4.** Thermal ellipsoid plot of  $\text{Co}_2(\text{dobdc})\cdot 0.58\text{CO}$  at 90 K drawn at 50% probability level as determined by single-crystal X-ray diffraction; purple, red, gray, and white ellipsoids represent Co, O, C, and H atoms, respectively.

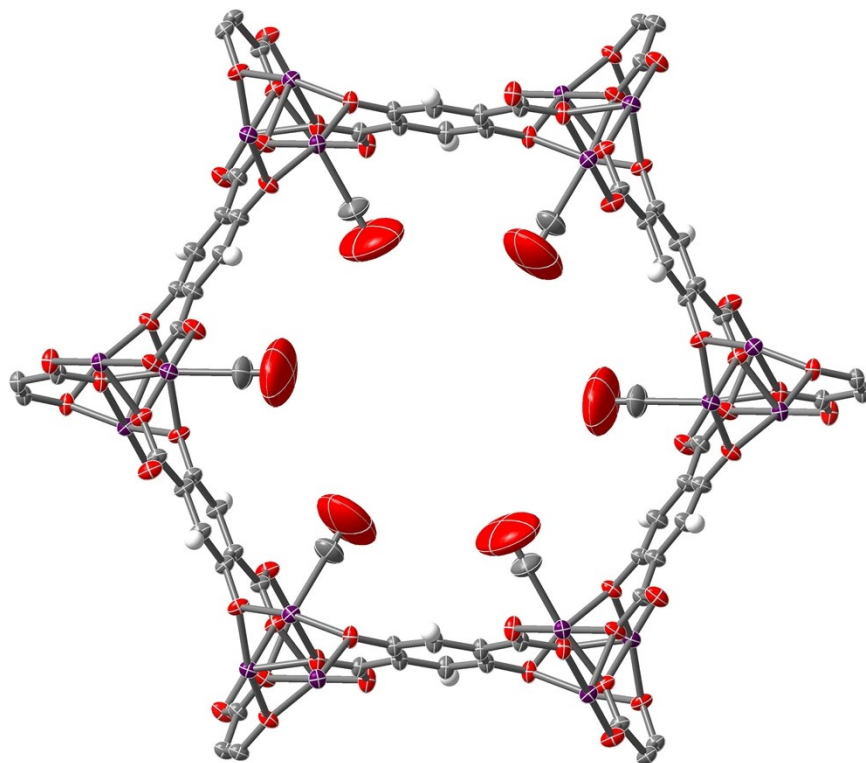

**Figure S5.** Thermal ellipsoid plot of  $\text{Co}_2(\text{dobdc}) \cdot 1.2\text{CO}$  at 100 K drawn at 50% probability level as determined by single-crystal X-ray diffraction; purple, red, gray, and white ellipsoids represent Co, O, C, and H atoms, respectively.

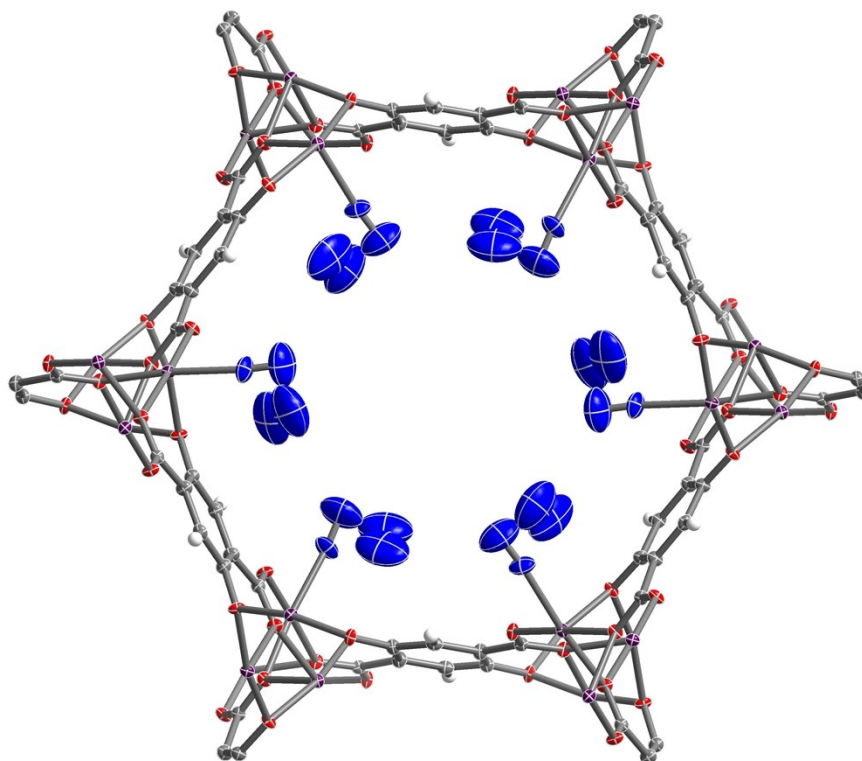

**Figure S6.** Thermal ellipsoid plot of  $\text{Co}_2(\text{dobdc}) \cdot 3.8\text{N}_2$  at 100 K drawn at 50% probability level as determined by single-crystal X-ray diffraction; purple, red, gray, blue, and white ellipsoids represent Co, O, C, N, and H atoms, respectively.



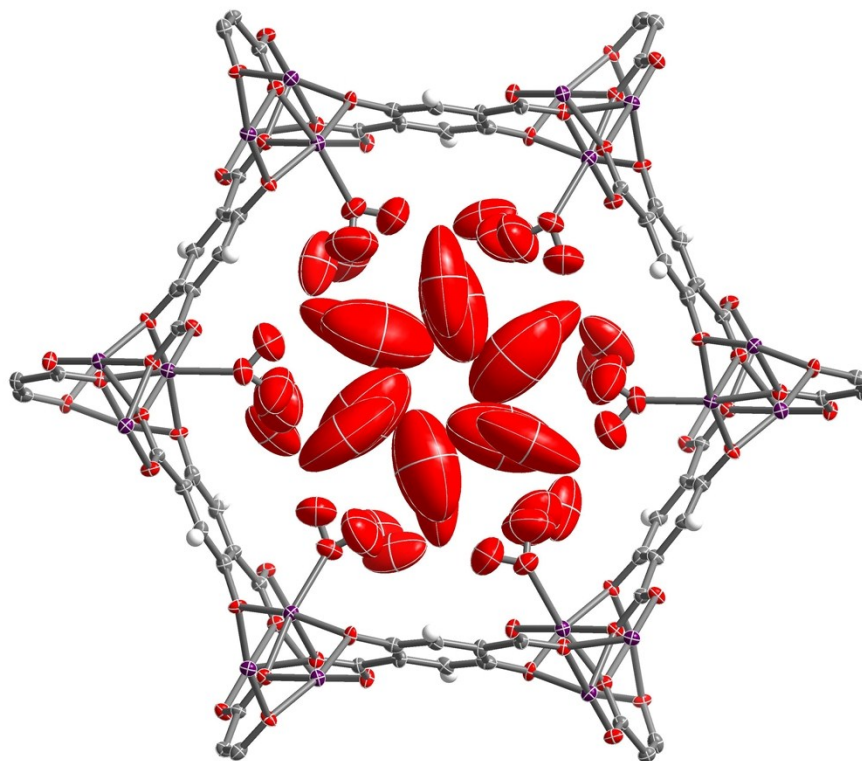

**Figure S7.** Thermal ellipsoid plot of  $\text{Co}_2(\text{dobdc}) \cdot 5.9\text{O}_2$  at 100 K drawn at 50% probability level as determined by single-crystal X-ray diffraction; purple, red, gray, and white ellipsoids represent Co, O, C, and H atoms, respectively. Note,  $\text{O}_2$  bound to the  $\text{Co}^{\text{II}}$  sites were found to be disordered over two orientations with relative occupancies of 73(3)% and 27(3)%.

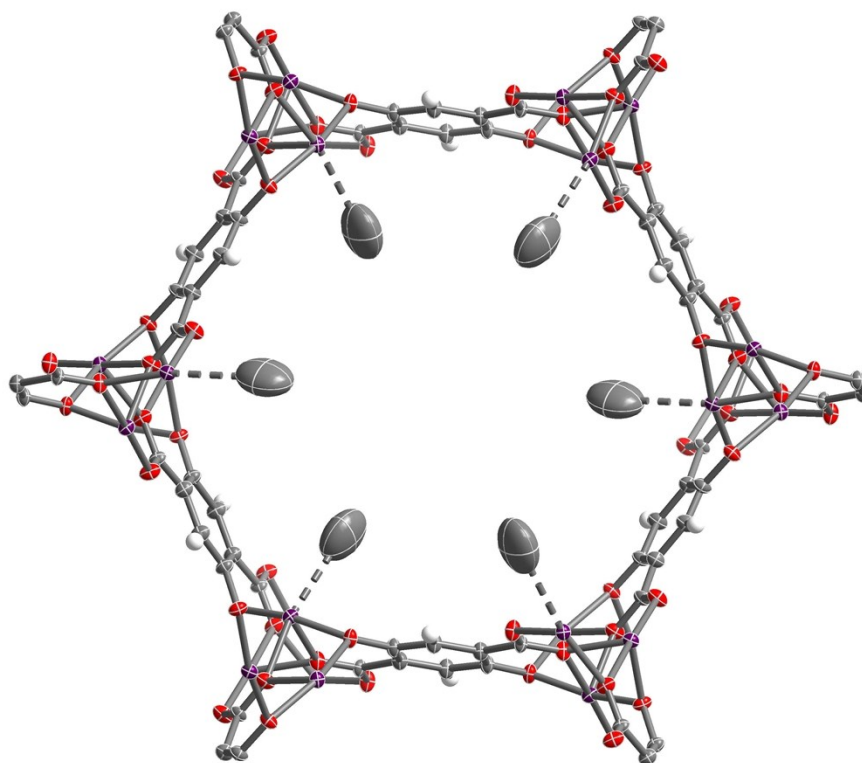

**Figure S8.** Thermal ellipsoid plot of  $\text{Co}_2(\text{dobdc}) \cdot 2.0\text{CH}_4$  at 100 K drawn at 50% probability level as determined by single-crystal X-ray diffraction; purple, red, gray, and white ellipsoids represent Co, O, C, and H atoms, respectively.

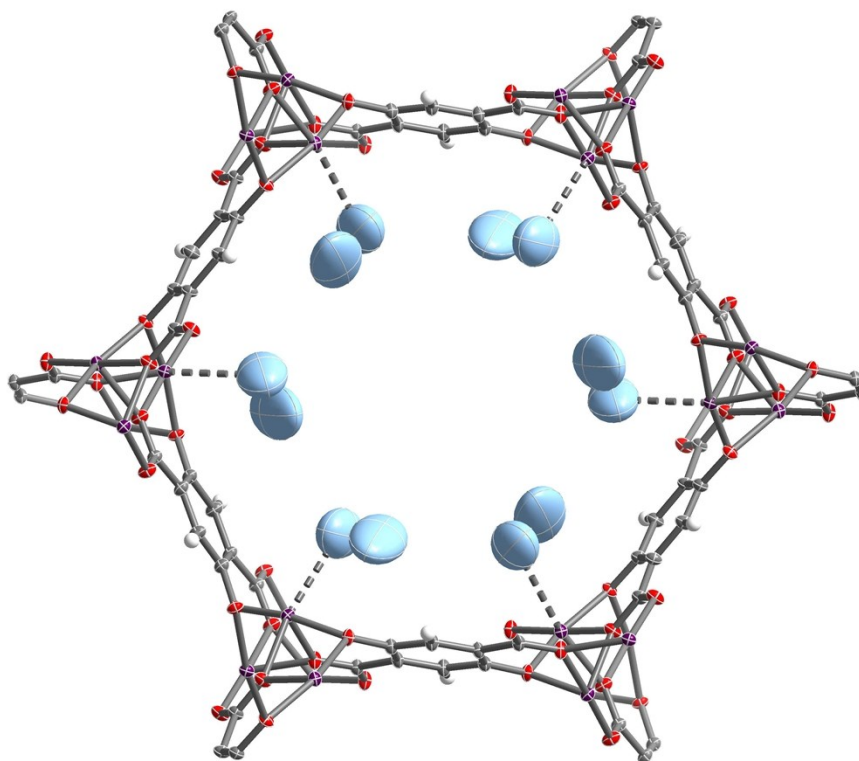

**Figure S9.** Thermal ellipsoid plot of  $\text{Co}_2(\text{dobdc})\cdot 2.0\text{Ar}$  at 90 K drawn at 50% probability level as determined by single-crystal X-ray diffraction; purple, red, gray, light blue, and white ellipsoids represent Co, O, C, Ar, and H atoms, respectively.

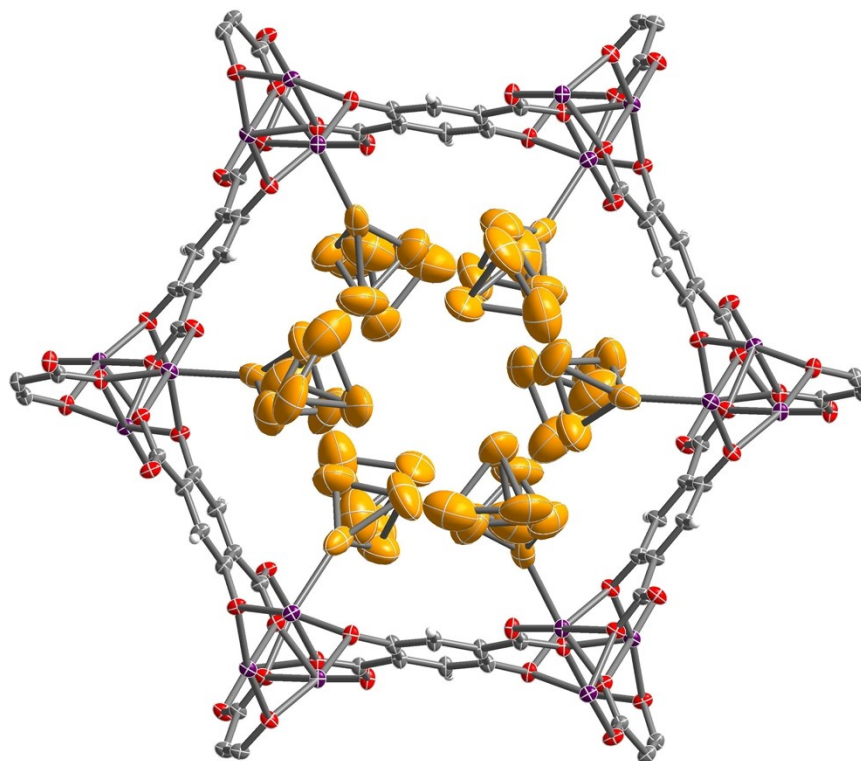

**Figure S10.** Thermal ellipsoid plot of  $\text{Co}_2(\text{dobdc}) \cdot 1.3\text{P}_4$  at 100 K drawn at 50% probability level as determined by single-crystal X-ray diffraction; purple, red, gray, light orange, and white ellipsoids represent Co, O, C, P, and H atoms, respectively. Note, the  $\text{P}_4$  molecules were found in two positions, one with  $\text{P}_4$  molecules coordinated to the  $\text{Co}^{\text{II}}$  sites (45.5(10)% occupancy) and another 3.88(3) Å away from the  $\text{Co}^{\text{II}}$  sites centers (20.6(10)% occupancy).

**Table S1. Crystallographic Data**

|                                                        | Co <sub>2</sub> (dobdc)                                      | Co <sub>2</sub> (dobdc)-0.58CO                                     | Co <sub>2</sub> (dobdc)-1.2CO                                      | Co <sub>2</sub> (dobdc)-3.8N <sub>2</sub>                                      | Co <sub>2</sub> (dobdc)-5.9O <sub>2</sub>                        | Co <sub>2</sub> (dobdc)-2.0CH <sub>4</sub>                     | Co <sub>2</sub> (dobdc)-2.0Ar                                                | Co <sub>2</sub> (dobdc)-1.3P <sub>4</sub>                                      |
|--------------------------------------------------------|--------------------------------------------------------------|--------------------------------------------------------------------|--------------------------------------------------------------------|--------------------------------------------------------------------------------|------------------------------------------------------------------|----------------------------------------------------------------|------------------------------------------------------------------------------|--------------------------------------------------------------------------------|
| Formula                                                | Co <sub>2</sub> C <sub>8</sub> H <sub>2</sub> O <sub>6</sub> | Co <sub>2</sub> C <sub>8.58</sub> H <sub>2</sub> O <sub>6.58</sub> | Co <sub>2</sub> C <sub>9.19</sub> H <sub>2</sub> O <sub>7.18</sub> | Co <sub>2</sub> C <sub>8</sub> H <sub>2</sub> N <sub>7.56</sub> O <sub>6</sub> | Co <sub>2</sub> C <sub>8</sub> H <sub>2</sub> O <sub>17.88</sub> | Co <sub>2</sub> C <sub>10</sub> H <sub>10</sub> O <sub>6</sub> | Co <sub>2</sub> C <sub>8</sub> H <sub>2</sub> O <sub>6</sub> Ar <sub>2</sub> | Co <sub>2</sub> C <sub>8</sub> H <sub>2</sub> O <sub>6</sub> P <sub>5.28</sub> |
| Temperature (K)                                        | 296(2)                                                       | 90(2)                                                              | 100(2)                                                             | 100(2)                                                                         | 100(2)                                                           | 100(2)                                                         | 90(2)                                                                        | 100(2)                                                                         |
| Crystal System                                         | Trigonal                                                     | Trigonal                                                           | Trigonal                                                           | Trigonal                                                                       | Trigonal                                                         | Trigonal                                                       | Trigonal                                                                     | Trigonal                                                                       |
| Space Group                                            | <i>R</i> $\bar{3}$                                           | <i>R</i> $\bar{3}$                                                 | <i>R</i> $\bar{3}$                                                 | <i>R</i> $\bar{3}$                                                             | <i>R</i> $\bar{3}$                                               | <i>R</i> $\bar{3}$                                             | <i>R</i> $\bar{3}$                                                           | <i>R</i> $\bar{3}$                                                             |
| a, b, c (Å)                                            | 25.892(4),<br>25.892(4),<br>6.8482(9)                        | 25.8262(16),<br>25.8262(16),<br>6.8315(4)                          | 25.853(3),<br>25.853(3),<br>6.8494(7)                              | 25.810(8),<br>25.810(8),<br>6.901(2)                                           | 25.7599(9),<br>25.7599(9),<br>6.8766(3)                          | 25.866(5),<br>25.866(5),<br>6.8457(12)                         | 25.860(4),<br>25.860(4),<br>6.8678(10)                                       | 25.7348(8),<br>25.7348(8),<br>6.8385(2)                                        |
| $\alpha, \beta, \gamma$ (°)                            | 90, 90, 120                                                  | 90, 90, 120                                                        | 90, 90, 120                                                        | 90, 90, 120                                                                    | 90, 90, 120                                                      | 90, 90, 120                                                    | 90, 90, 120                                                                  | 90, 90, 120                                                                    |
| <i>V</i> , (Å <sup>3</sup> )                           | 3975.9(12)                                                   | 3946.1(5)                                                          | 3964.6(9)                                                          | 3981(3)                                                                        | 3951.8(3)                                                        | 3966.4(15)                                                     | 3977.5(12)                                                                   | 3922.2(3)                                                                      |
| Z                                                      | 9                                                            | 9                                                                  | 9                                                                  | 9                                                                              | 9                                                                | 9                                                              | 9                                                                            | 9                                                                              |
| Radiation,<br>$\lambda$ (Å)                            | Synchrotron,<br>0.7749                                       | Synchrotron,<br>0.7749                                             | Synchrotron,<br>0.7749                                             | Synchrotron,<br>0.6199                                                         | Synchrotron,<br>0.7749                                           | Synchrotron,<br>0.7749                                         | Synchrotron,<br>0.6525                                                       | Synchrotron,<br>0.7749                                                         |
| 2 $\Theta$ Range for<br>Data Collection<br>(°)         | 6.782 to 64.176                                              | 6.8 to 69.512                                                      | 6.782 to 69.43                                                     | 4.768 to 47.466                                                                | 5.974 to 54.904                                                  | 6.786 to 65.124                                                | 5.696 to 63.570                                                              | 6.796 to 74.476                                                                |
| Completeness to<br>2 $\Theta$                          | 99.9%<br>(2 $\Theta$ = 55.412°)                              | 99.0%<br>(2 $\Theta$ = 55.412°)                                    | 99.9%<br>(2 $\Theta$ = 55.412°)                                    | 99.9%<br>(2 $\Theta$ = 43.670°)                                                | 99.1%<br>(2 $\Theta$ = 54.904°)                                  | 99.8%<br>(2 $\Theta$ = 55.412°)                                | 99.8%<br>(2 $\Theta$ = 46.096°)                                              | 99.9%<br>(2 $\Theta$ = 55.412°)                                                |
| Data / Restraints<br>/ Parameters                      | 2374 / 0 / 74                                                | 2857 / 0 / 92                                                      | 2885 / 9 / 92                                                      | 2040 / 8 / 110                                                                 | 1536 / 34 / 138                                                  | 2442 / 0 / 83                                                  | 3887 / 6 / 94                                                                | 3479 / 216 / 148                                                               |
| Goodness of Fit<br>on $F^2$                            | 1.116                                                        | 1.070                                                              | 1.051                                                              | 1.190                                                                          | 1.015                                                            | 1.064                                                          | 1.072                                                                        | 1.198                                                                          |
| $R1^a$ , $wR2^b$<br>( $I > 2\sigma(I)$ )               | 0.0485,<br>0.1370                                            | 0.0274,<br>0.0696                                                  | 0.0389,<br>0.0978                                                  | 0.0632,<br>0.1233                                                              | 0.0481,<br>0.1045                                                | 0.0477,<br>0.1205                                              | 0.0513,<br>0.1272                                                            | 0.0822,<br>0.2465                                                              |
| $R1^a$ , $wR2^b$<br>(all data)                         | 0.0564,<br>0.1453                                            | 0.0317,<br>0.0718                                                  | 0.0491,<br>0.1032                                                  | 0.0805,<br>0.1328                                                              | 0.0860,<br>0.1203                                                | 0.0558,<br>0.1271                                              | 0.0637,<br>0.1358                                                            | 0.0902,<br>0.2530                                                              |
| Largest Diff.<br>Peak and Hole<br>(e Å <sup>-3</sup> ) | 0.990 and<br>-0.519                                          | 0.578 and<br>-0.391                                                | 0.454 and<br>-0.432                                                | 0.688 and<br>-0.753                                                            | 0.826 and<br>-0.587                                              | 0.777 and<br>-0.482                                            | 1.740 and<br>-0.956                                                          | 2.388 and<br>-1.557                                                            |

$$^a R_1 = \sum ||F_o| - |F_c|| / \sum |F_o|, \quad ^b wR_2 = \{ \sum [w(F_o^2 - F_c^2)^2] / \sum [w(F_o^2)^2] \}^{1/2}.$$

### Langmuir fits for low-pressure gas adsorption isotherms of $\text{CO}_2(\text{dobdc})$

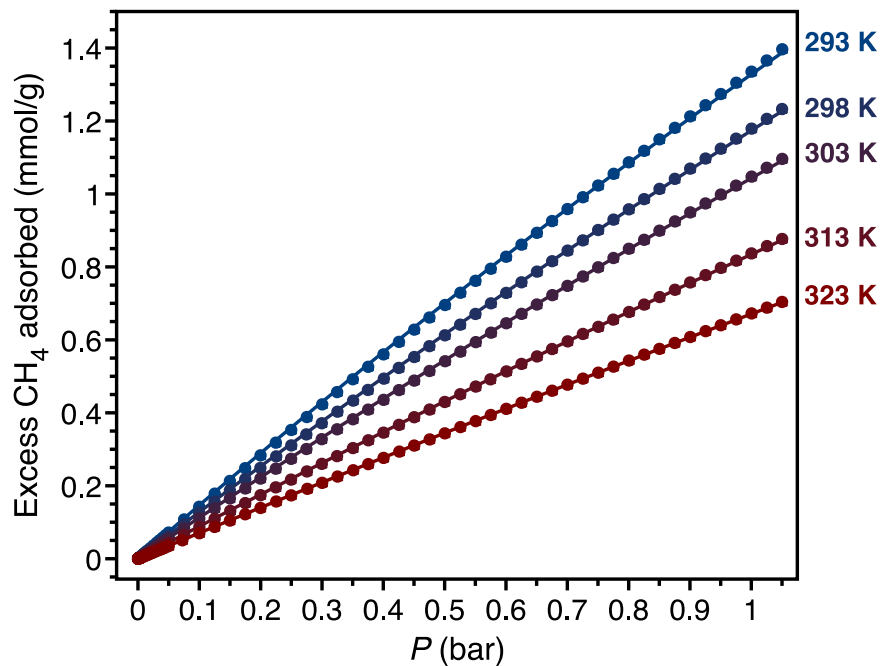

| $T$ (K) | $n_{\text{sat},1}$ (mmol/g) | $S_1$ (R) | $-E_1$ (kJ/mol) | $n_{\text{sat},2}$ (mmol/g) | $S_2$ (R) | $-E_2$ (kJ/mol) |
|---------|-----------------------------|-----------|-----------------|-----------------------------|-----------|-----------------|
| 293.15  | 6.41                        | 10.6      | 20.6            | 6.41                        | 9.39      | 17.6            |
| 298.15  | 6.41                        | 10.5      | 20.3            | 6.41                        | 9.33      | 17.4            |
| 303.15  | 6.41                        | 10.6      | 20.6            | 6.41                        | 9.42      | 17.6            |
| 313.15  | 6.41                        | 10.6      | 20.6            | 6.41                        | 9.42      | 17.6            |
| 323.15  | 6.41                        | 10.5      | 20.4            | 6.41                        | 9.39      | 17.5            |

**Figure S11.** Dual-site Langmuir fits and parameters for  $\text{CH}_4$  adsorption isotherms of  $\text{CO}_2(\text{dobdc})$  at 293.15, 298.15, 303.15, 313.15, 323.15 K (fit independently for each temperature);  $T$  is the temperature,  $n_{\text{sat},i}$  is the saturation capacity,  $S_i$  is the site-specific molar entropy of adsorption,  $E_i$  is the site-specific binding energy, and  $R$  is the gas constant in  $\text{J/mol}\cdot\text{K}$ .

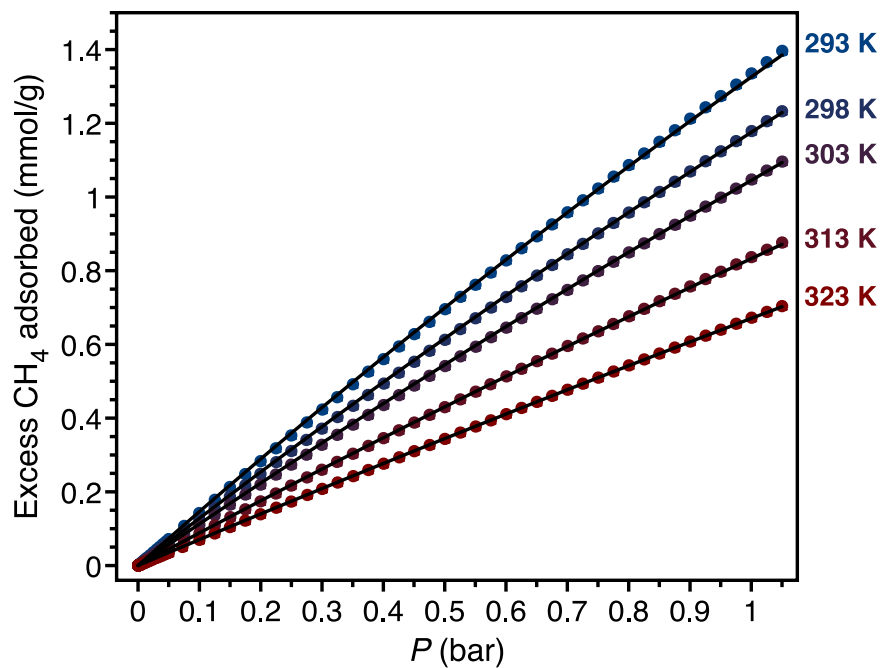

| $n_{\text{sat},1}$ (mmol/g) | $S_1$ (R) | $-E_1$ (kJ/mol) | $n_{\text{sat},2}$ (mmol/g) | $S_2$ (R) | $-E_2$ (kJ/mol) |
|-----------------------------|-----------|-----------------|-----------------------------|-----------|-----------------|
| 6.41                        | 10.1      | 19.4            | 6.41                        | 10.1      | 19.3            |

**Figure S12.** Dual-site Langmuir fits and parameters for CH<sub>4</sub> adsorption isotherms of Co<sub>2</sub>(dobdc) at 293.15, 298.15, 303.15, 313.15, 323.15 K (fit simultaneously for all temperatures);  $n_{\text{sat},i}$  is the saturation capacity,  $S_i$  is the site-specific molar entropy of adsorption,  $E_i$  is the site-specific binding energy, and R is the gas constant in J/mol·K.

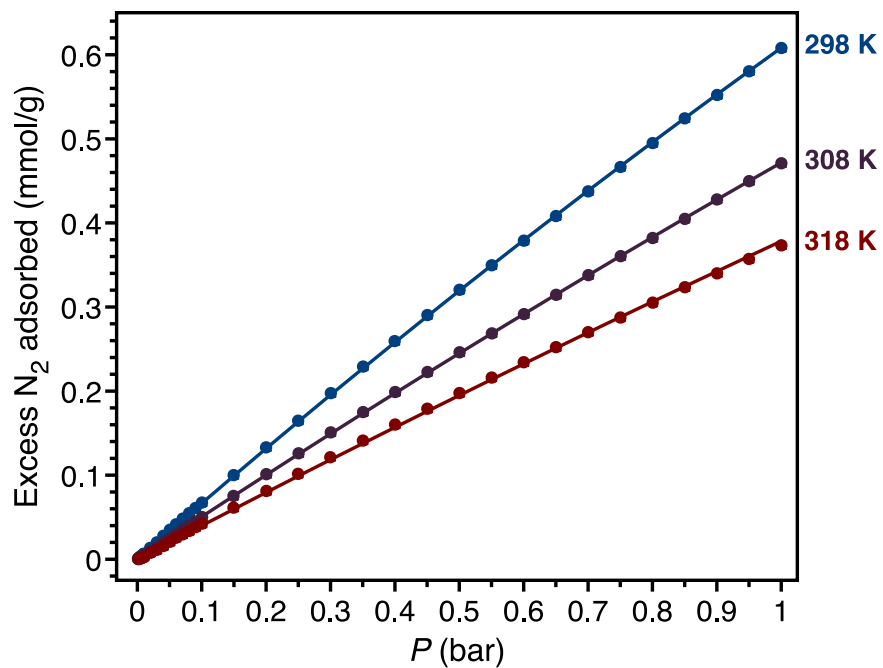

| $T$ (K) | $n_{\text{sat},1}$ (mmol/g) | $S_1$ (R) | $-E_1$ (kJ/mol) |
|---------|-----------------------------|-----------|-----------------|
| 298.15  | 6.41                        | 10.1      | 19.5            |
| 308.15  | 6.41                        | 10.2      | 19.6            |
| 318.15  | 6.41                        | 10.2      | 19.6            |

**Figure S13.** Single-site Langmuir fits and parameters for  $\text{N}_2$  adsorption isotherms of  $\text{Co}_2(\text{dobdc})$  at 298.15, 308.15, and 318.15 K (fit independently for each temperature);  $T$  is the temperature,  $n_{\text{sat},1}$  is the saturation capacity,  $S_1$  is the site-specific molar entropy of adsorption,  $E_1$  is the site-specific binding energy, and  $R$  is the gas constant in  $\text{J/mol}\cdot\text{K}$ .



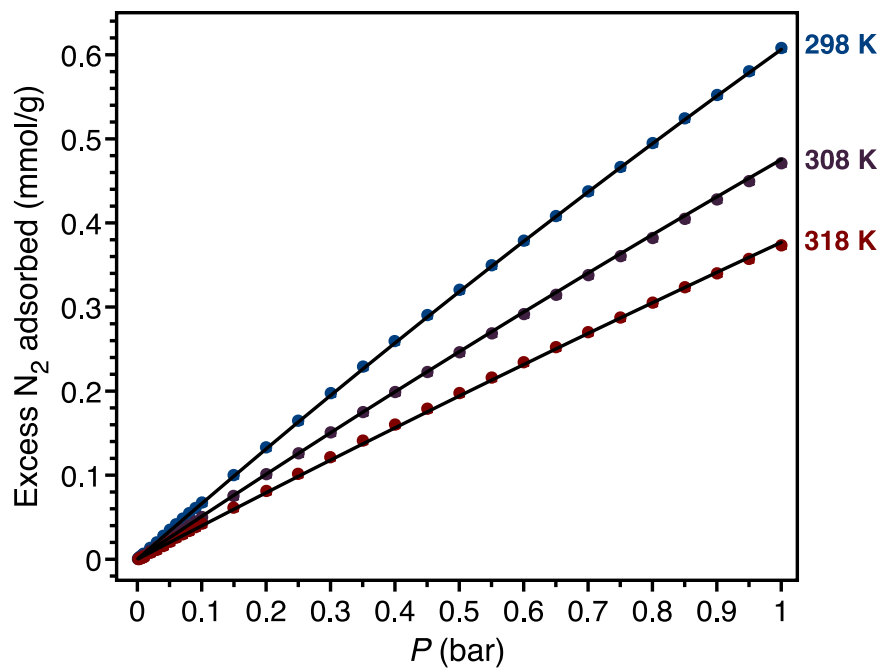

| $n_{sat,1}$ (mmol/g) | $S_1$ (R) | $-E_1$ (kJ/mol) |
|----------------------|-----------|-----------------|
| 6.41                 | 10.4      | 20.3            |

**Figure S14.** Single-site Langmuir fit and parameters for N<sub>2</sub> adsorption isotherms of Co<sub>2</sub>(dobdc) at 298.15, 308.15, and 318.15 K (fit simultaneously for all temperatures);  $n_{sat,1}$  is the saturation capacity,  $S_i$  is the site-specific molar entropy of adsorption,  $E_i$  is the site-specific binding energy, and R is the gas constant in J/mol·K.

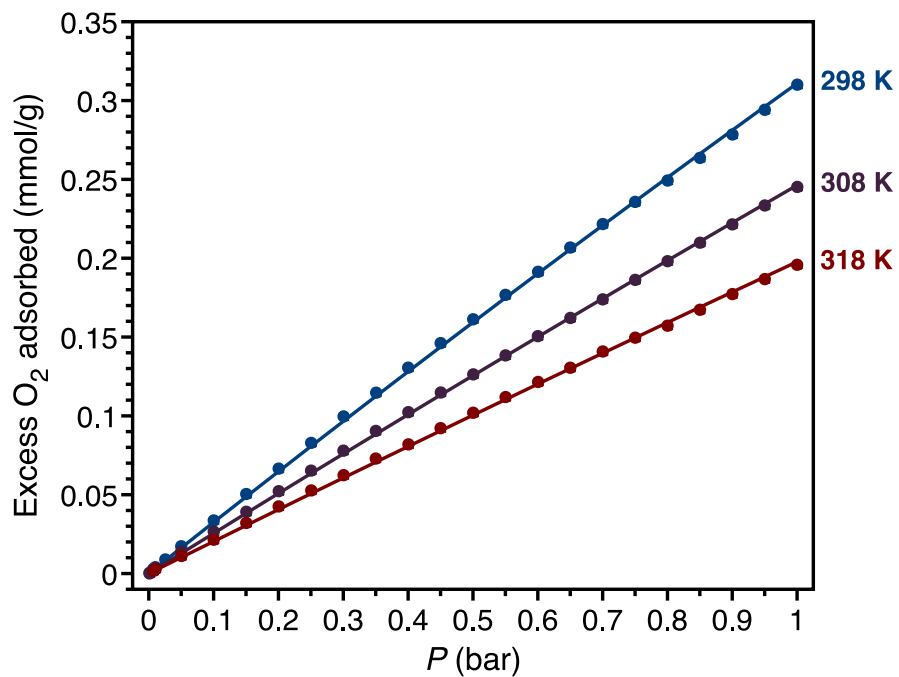

| $T$ (K) | $n_{\text{sat},1}$ (mmol/g) | $S_1$ (R) | $-E_1$ (kJ/mol) |
|---------|-----------------------------|-----------|-----------------|
| 298.15  | 6.41                        | 10.6      | 18.8            |
| 308.15  | 6.41                        | 10.6      | 19.0            |
| 318.15  | 6.41                        | 10.6      | 19.0            |

**Figure S15.** Single-site Langmuir fits and parameters for O<sub>2</sub> adsorption isotherms of Co<sub>2</sub>(dobdc) at 298.15, 308.15, and 318.15 K (fit independently for each temperature);  $T$  is the temperature,  $n_{\text{sat},1}$  is the saturation capacity,  $S_1$  is the site-specific molar entropy of adsorption,  $E_1$  is the site-specific binding energy, and R is the gas constant in J/mol·K.

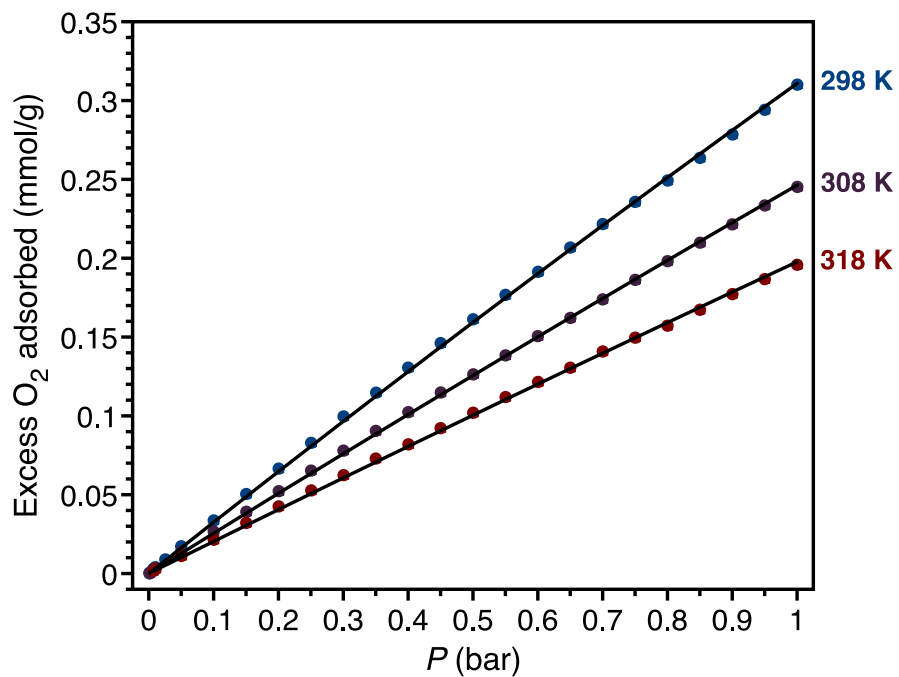

| $n_{\text{sat},1}$ (mmol/g) | $S_1$ (R) | $-E_1$ (kJ/mol) |
|-----------------------------|-----------|-----------------|
| 6.41                        | 10.5      | 18.5            |

**Figure S16.** Single-site Langmuir fits and parameters for O<sub>2</sub> adsorption isotherms of Co<sub>2</sub>(dobdc) at 298.15, 308.15, and 318.15 K (fit simultaneously for all temperatures);  $n_{\text{sat},1}$  is the saturation capacity,  $S_i$  is the site-specific molar entropy of adsorption,  $E_i$  is the site-specific binding energy, and R is the gas constant in J/mol·K.

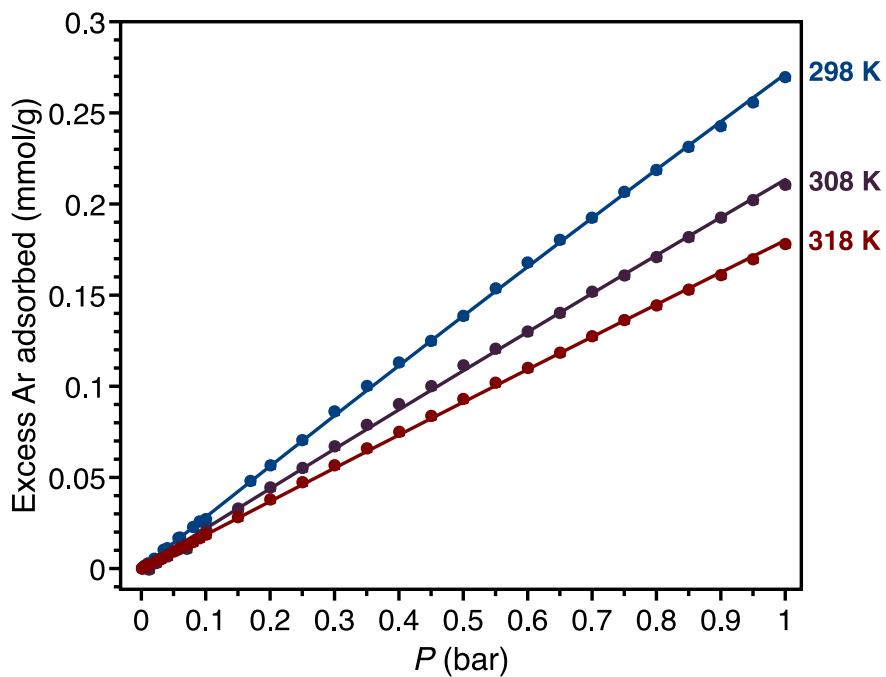

| $T$ (K) | $n_{\text{sat},1}$ (mmol/g) | $S_1$ (R) | $-E_1$ (kJ/mol) |
|---------|-----------------------------|-----------|-----------------|
| 298.15  | 6.41                        | 9.88      | 16.8            |
| 308.15  | 6.41                        | 9.90      | 16.7            |
| 318.15  | 6.41                        | 9.82      | 16.6            |

**Figure S17.** Single-site Langmuir fits and parameters for Ar adsorption isotherms of  $\text{Co}_2(\text{dobdc})$  at 298.15, 308.15, and 318.15 K (fit independently for each temperature);  $T$  is the temperature,  $n_{\text{sat},1}$  is the saturation capacity,  $S_1$  is the site-specific molar entropy of adsorption,  $E_1$  is the site-specific binding energy, and  $R$  is the gas constant in  $\text{J/mol}\cdot\text{K}$ .

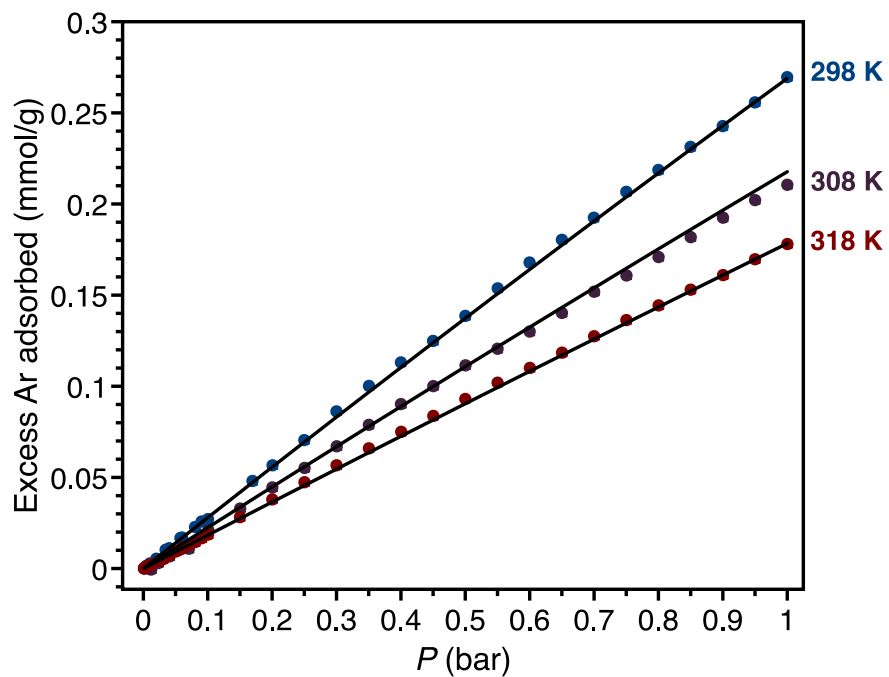

| $n_{\text{sat},1}$ (mmol/g) | $S_1$ (R) | $-E_1$ (kJ/mol) |
|-----------------------------|-----------|-----------------|
| 6.41                        | 9.89      | 16.7            |

**Figure S18.** Single-site Langmuir fits and parameters for Ar adsorption isotherms of  $\text{Co}_2(\text{dobdc})$  at 298.15, 308.15, and 318.15 K (fit simultaneously for all temperatures);  $n_{\text{sat},1}$  is the saturation capacity,  $S_i$  is the site-specific molar entropy of adsorption,  $E_i$  is the site-specific binding energy, and R is the gas constant in J/mol·K.

## Low-coverage differential enthalpy of adsorption plots for Co<sub>2</sub>(dobdc)

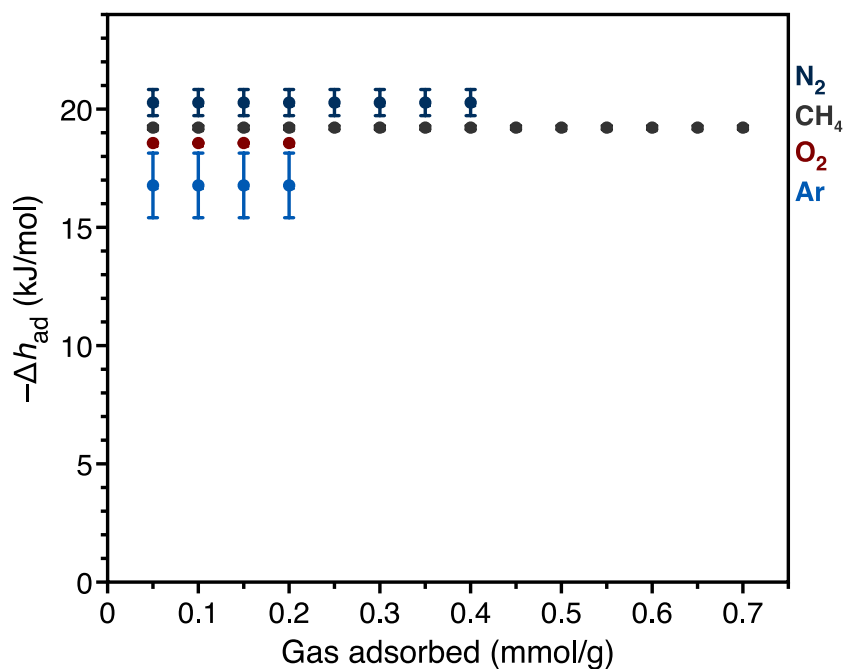

**Figure S19.** Low-coverage differential enthalpy of adsorption ( $\Delta h_{ad}$ ) plots (calculated using independent Langmuir fits to low-pressure adsorption isotherms) for CH<sub>4</sub> (gray), N<sub>2</sub> (dark blue), O<sub>2</sub> (red), and Ar (light blue) adsorption in Co<sub>2</sub>(dobdc). Error bars for CH<sub>4</sub> and O<sub>2</sub> are smaller than the symbols used for the data.

## References

- 1 W. L. Queen, M. R. Hudson, E. D. Bloch, J. A. Mason, M. I. Gonzalez, J. S. Lee, D. Gygi, J. D. Howe, K. Lee, T. A. Darwish, M. James, V. K. Peterson, S. J. Teat, B. Smit, J. B. Neaton, J. R. Long and C. M. Brown, *Chem. Sci.*, 2014, **5**, 4569–4581.
- 2 R. Mercado, B. Vlaisavljevich, L.-C. Lin, K. Lee, Y. Lee, J. A. Mason, D. J. Xiao, M. I. Gonzalez, M. T. Kapelewski, J. B. Neaton and B. Smit, *J. Phys. Chem. C*, 2016, **120**, 12590–12604.
